# Supplementary material for: Cutin from Solanum Myriacanthum Dunal and Solanum Aculeatissimum Jacq. as a Potential Raw Material for Biopolymers
Source: PubMed Central journal article supplement (PMC7565047; doi:10.3390/polym12091945), 2020-08-28

SUPPLEMENTARY MATERIAL

<sup>1</sup>H NMR of the 18-hydroxy-9S,10R-epoxy-octadecanoic acid

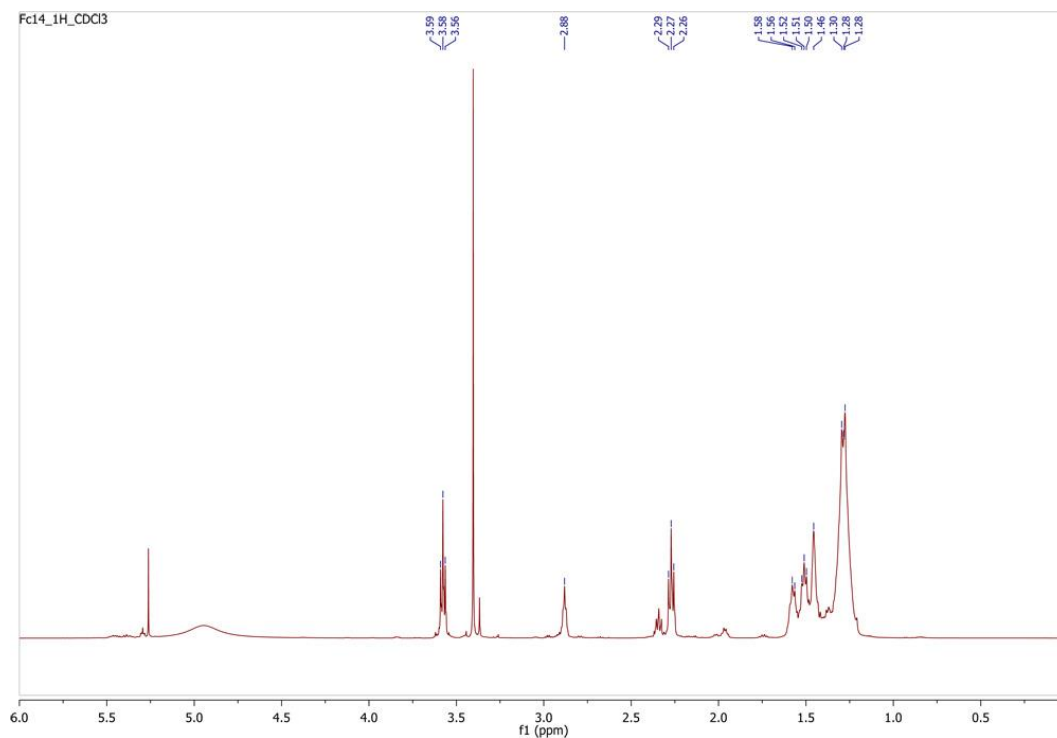

Comparative spectra of the simulated and experimental <sup>1</sup>H NMR of the 18-hydroxy-9S,10R-epoxy-octadecanoic acid

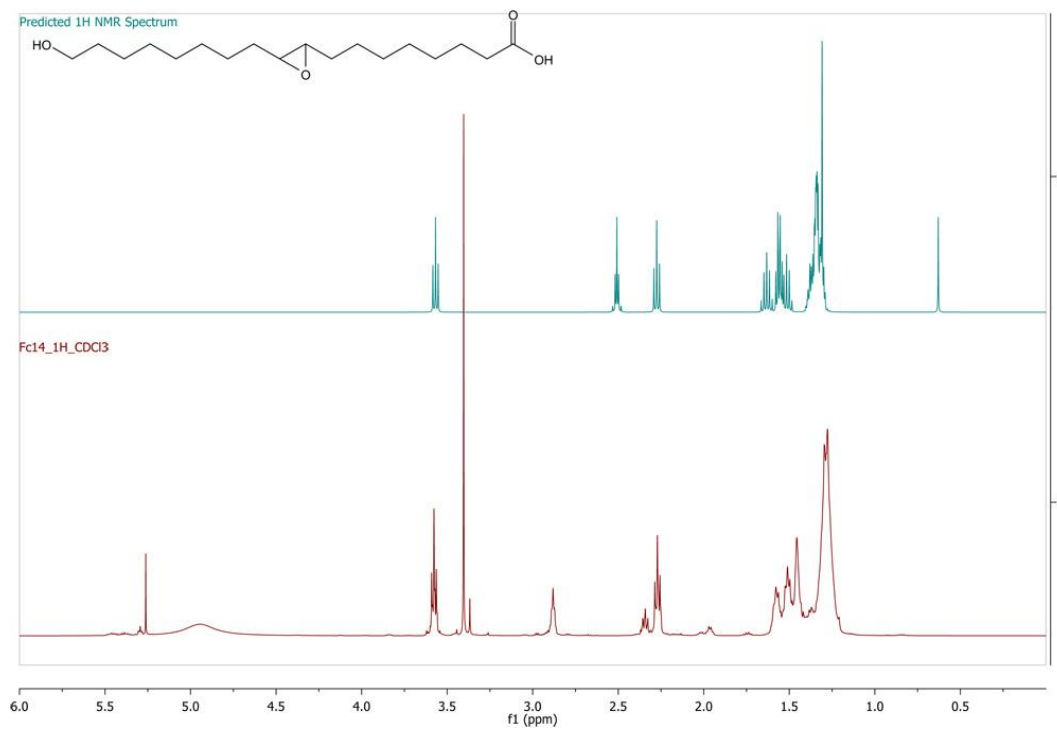

### <sup>13</sup>C NMR of the 18-hydroxy-9S,10R-epoxy-octadecanoic acid

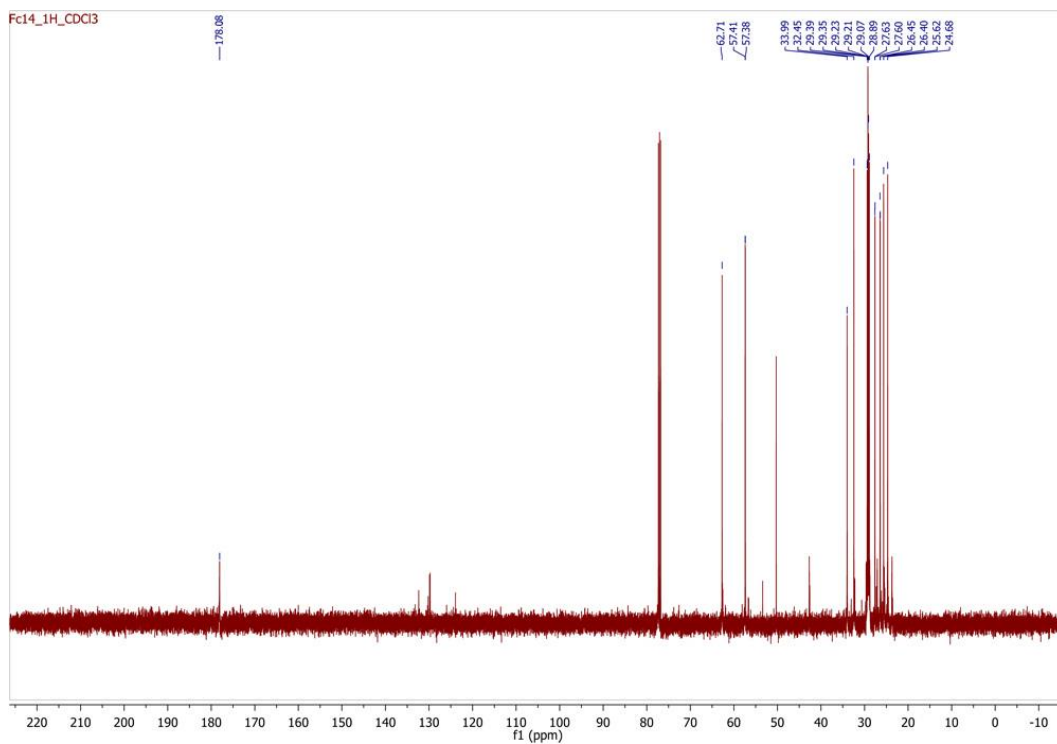

### Comparative spectra of the simulated and experimental <sup>13</sup>C NMR of the 18-hydroxy-9S,10R-epoxy-octadecanoic acid

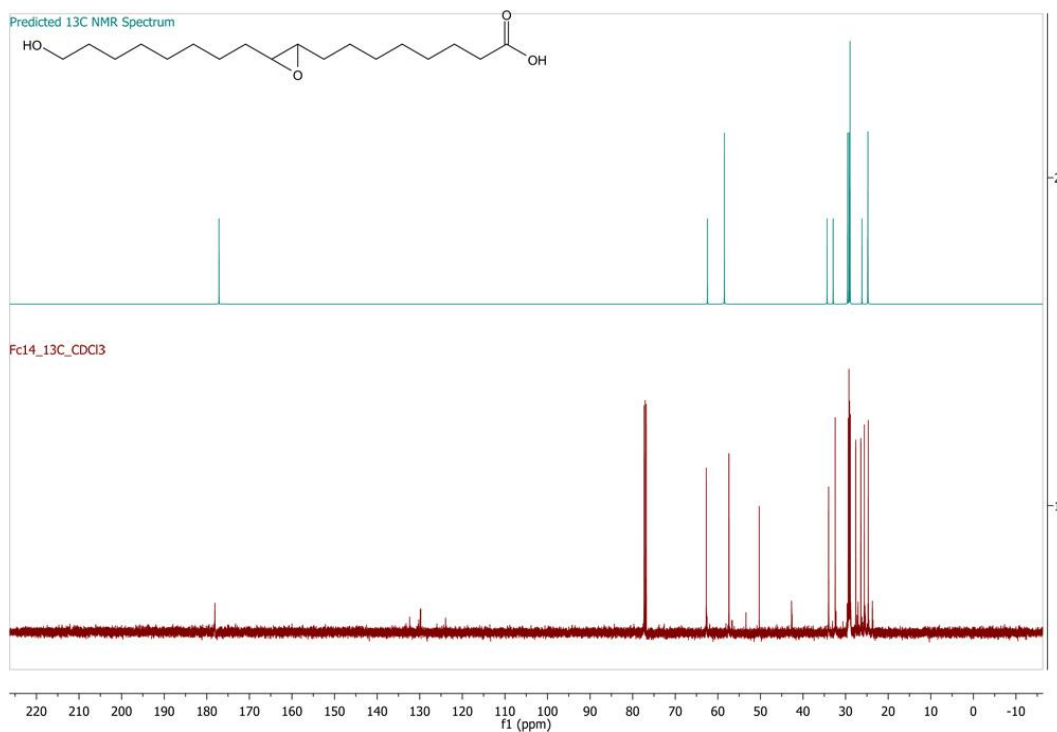

### HMBC NMR of the 18-hydroxy-9S,10R-epoxy-octadecanoic acid

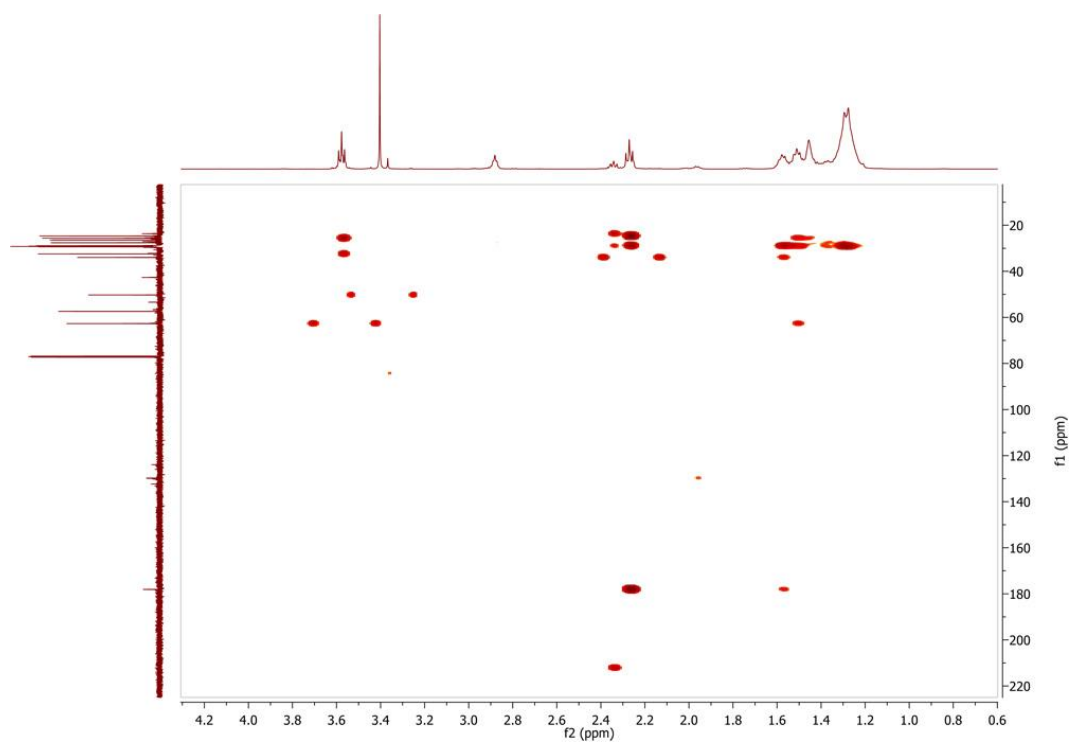

### ESI spectra of the 18-hydroxy-9S,10R-epoxy-octadecanoic acid

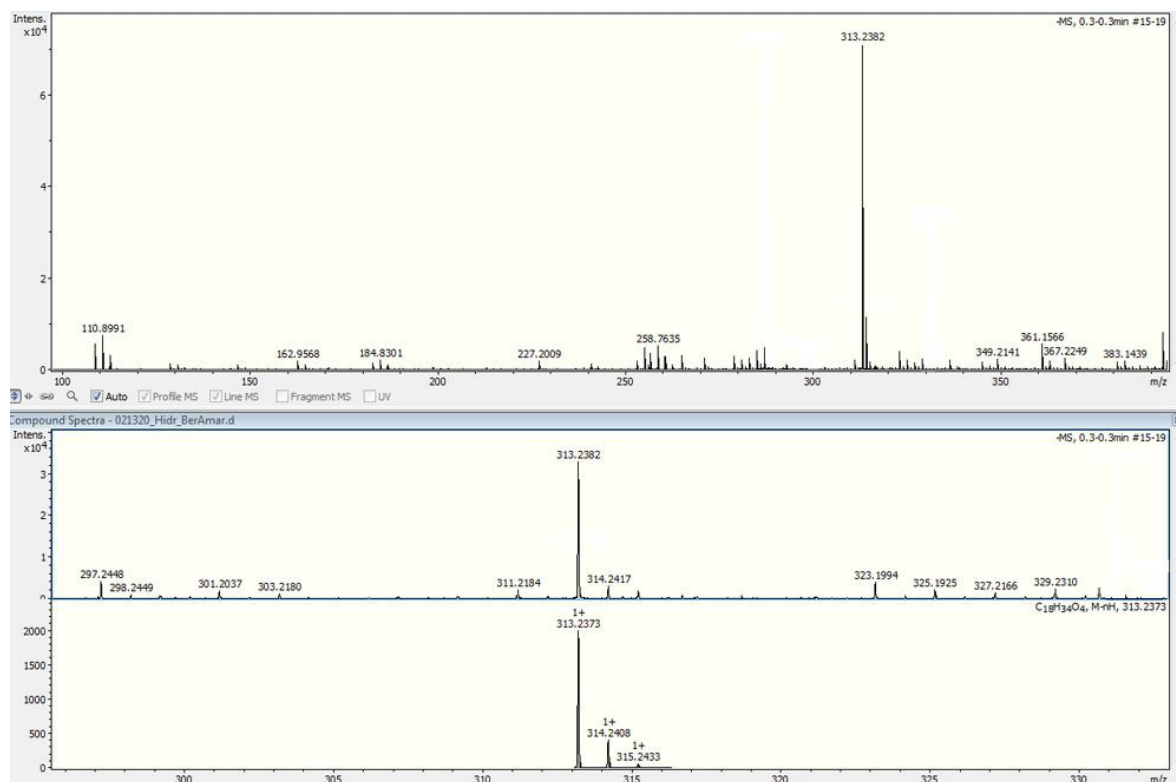

# DIESI-MS spectra of the hydrolyzed *S. aculeatissimum* cutin

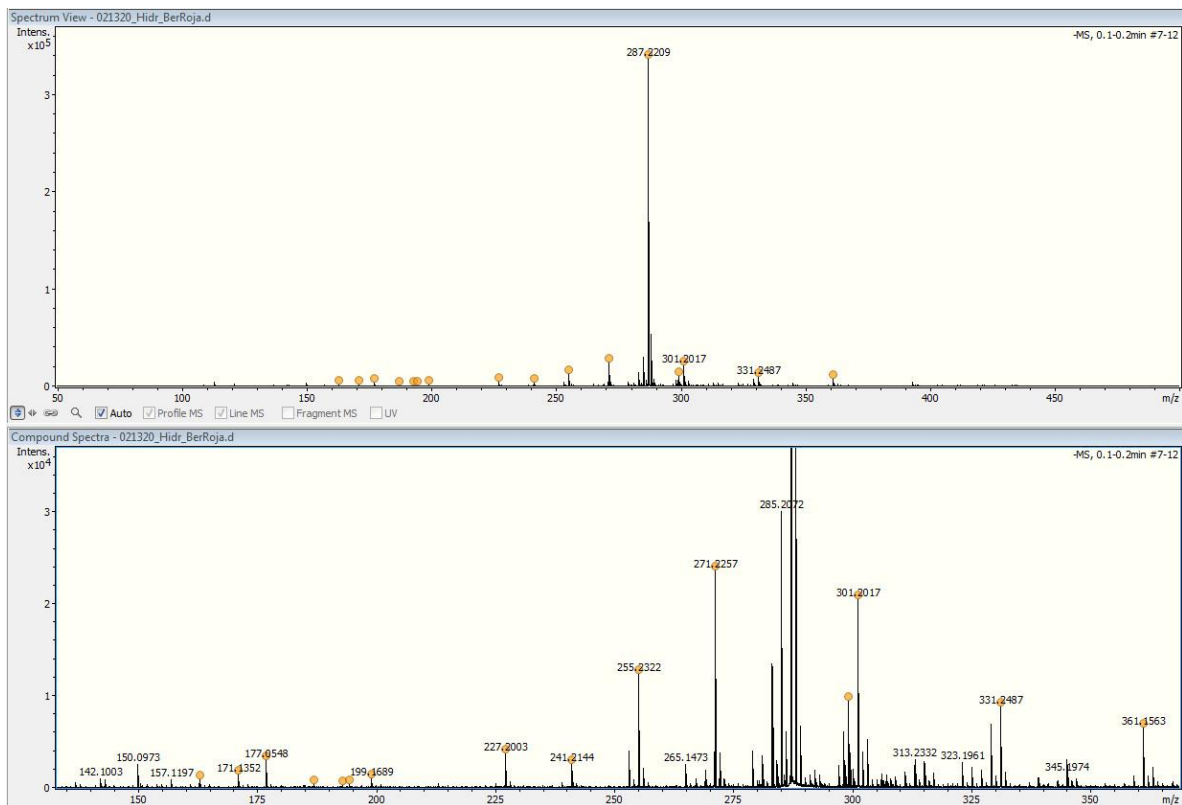

# DIESI-MS spectra of the hydrolyzed *S. myriacanthum* cutin

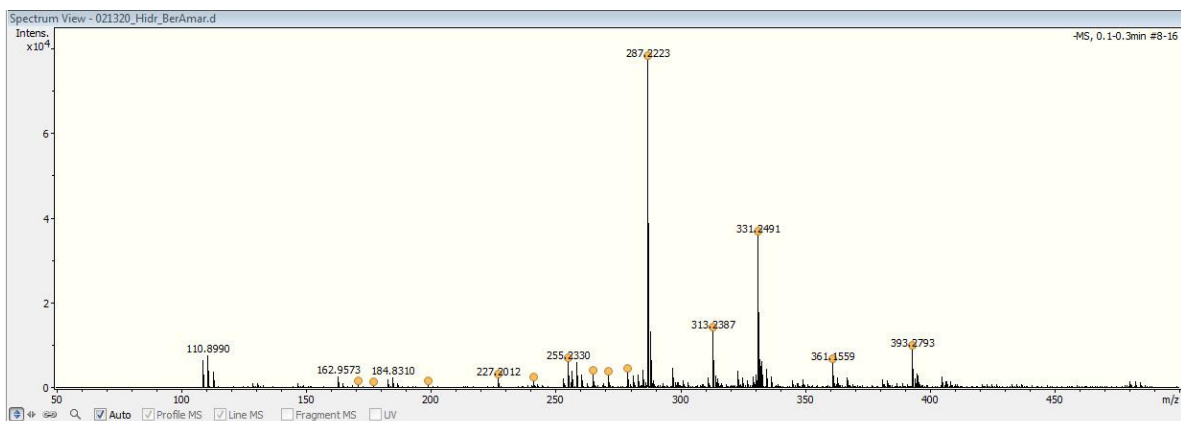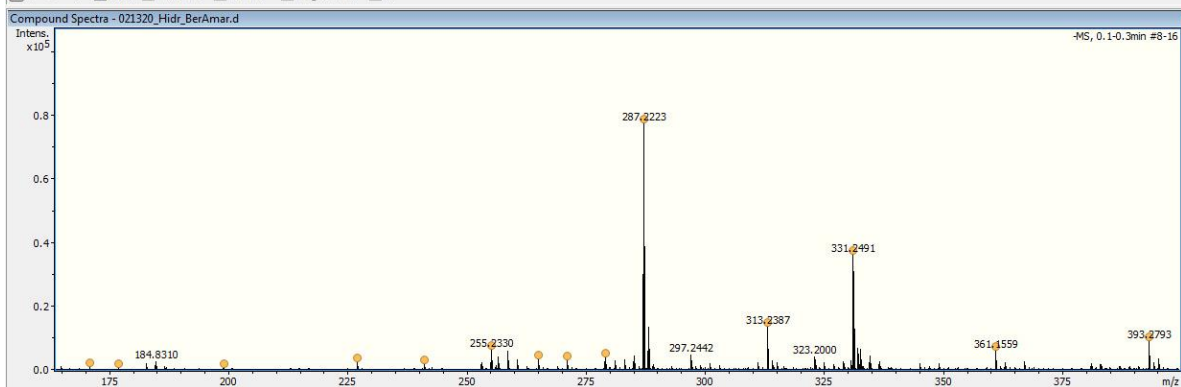

Supplement: polymers-12-01945-s001.pdf [file polymers-12-01945-s001.pdf]
